# Supplementary material
Source: Royal Society of Chemistry journal article supplement (doi:10.1039/d6cc01539e)
Supplement: d6cc01539e1.pdf [file d6cc01539e1.pdf]

## Supporting Information

### **Graphene aerogel-supported NiFe alloy for efficient anion exchange membrane water electrolysis**

Suhan Zhang,<sup>†a</sup> Jie Li,<sup>†a</sup> Mengrui Liu,<sup>a</sup> Yanqing Fu,<sup>a</sup> Likun Jia,<sup>a</sup> Lan Jiang,<sup>a\*</sup> Ruiyao Yu,<sup>a</sup> Bahar Karadeniz,<sup>b</sup> Krunoslav Užarević,<sup>b</sup> Joyal Johny,<sup>c,d</sup> Suraj Gupta,<sup>c,d</sup> Weiyu Yang,<sup>a</sup> Qiliang Wei<sup>a\*</sup>

<sup>a</sup>Institute of Micro/Nano Materials and Devices, Ningbo University of Technology, Ningbo, 315211, P. R. China.

Email: [lan22@126.com](mailto:lan22@126.com); [qiliang.wei@nbut.edu.cn](mailto:qiliang.wei@nbut.edu.cn)

<sup>b</sup>Ruđer Bošković Institute, Bijenička cesta 54, Zagreb, HR-10000, Croatia

<sup>c</sup>Advanced Materials Department, Jožef Stefan Institute, Jamova 39, 1000 Ljubljana, Slovenia

<sup>d</sup>Jožef Stefan International Postgraduate School, Jamova 39, 1000 Ljubljana, Slovenia

## **Experimental Section**

### **Materials**

Iron (III) chloride ( $\text{FeCl}_3$ , analytical grade) was purchased from Shanghai Aladdin Biochemical Technology Co., Ltd. Nickel (II) chloride hexahydrate ( $\text{NiCl}_2 \cdot 6\text{H}_2\text{O}$ , analytical grade) and potassium hydroxide (KOH, 90%) were purchased from Macklin Biochemical Co., Ltd. Nafion solution (5 wt%) was purchased from Sigma-Aldrich. Carbon paper (Sigracet 22 BB) was purchased from SGL Carbon. Ethanol ( $\text{C}_2\text{H}_5\text{OH}$ , 99.7%) were purchased from Macklin and Shanghai Aladdin, respectively. High-purity  $\text{N}_2$  ( $\geq 99.999\%$ ) were supplied by Cixi Sanjiang Gas Co., Ltd. Commercial graphene oxide (GO, analytical grade) was purchased from Suzhou TanFeng Technology Co., Ltd. Ultrapure water ( $18.2 \text{ M}\Omega \cdot \text{cm}$ ) was used throughout all experiments.

### **Preparation of Graphene Aerogel (GA)**

Graphene aerogel (GA) was prepared via hydrothermal self-assembly followed by freeze-drying. Briefly, 90 mg of commercial graphene oxide (GO) was dispersed in 18 mL ultrapure water in a 50 mL centrifuge tube. The mixture was ultrasonicated for 90 min to obtain a homogeneous and stable GO colloid. The resulting suspension was transferred into a Teflon-lined stainless-steel autoclave and heated at  $180 \text{ }^\circ\text{C}$  for 12 h. After cooling to room temperature, a porous monolithic graphene hydrogel (GH) was obtained. The GH was washed with ultrapure water by centrifugation for 5-6 cycles to thoroughly remove residual species. The cleaned hydrogel was then freeze-dried to yield a porous graphene aerogel (GA).

### **Thermal Annealing of GA (GA-250/300/350)**

To further remove residual oxygen-containing functional groups and enhance electrical conductivity, the freeze-dried GA precursor was annealed under  $\text{N}_2$  protection. Typically, 50 mg of GA was uniformly spread in a square ceramic boat and placed in the quartz tube of a tubular furnace. The furnace was purged with high-purity  $\text{N}_2$  for 30 min prior to heating. The sample was heated at a ramp rate of  $5 \text{ }^\circ\text{C min}^{-1}$  to  $250 \text{ }^\circ\text{C}$ ,  $300 \text{ }^\circ\text{C}$ ,  $350 \text{ }^\circ\text{C}$  and held for 2 h under flowing  $\text{N}_2$ , followed by natural cooling to room

temperature to obtain GA-250, GA-300, GA-350 respectively, and GO-300 were prepared by using commercial GO directly to anneal at 300 °C for 2h with the same procedure.

### **Synthesis of NiFe Alloy Nanoparticles on GA (NiFe@GA)**

NiFe@GA were synthesized via drop infiltration of metal precursors followed by rapid microwave-induced alloying. NiFe bimetal precursor solutions were prepared using NiCl<sub>2</sub>·6H<sub>2</sub>O and anhydrous FeCl<sub>3</sub> with Ni:Fe molar ratios of 4:0, 3:1, 2:2, 1:3, and 0:4, denoted as Ni<sub>4</sub>, Ni<sub>3</sub>Fe, Ni<sub>2</sub>Fe<sub>2</sub>, NiFe<sub>3</sub>, and Fe<sub>4</sub>, respectively. For each composition, the total metal-ion concentration was adjusted to 0.5, 1.0, or 2.0 mM. Typically, 2.0 mg of GA-300 was placed in a glass Petri dish. 100 μL precursor solution was added dropwise onto the GA-300 scaffold until it was fully wetted. The impregnated sample was dried in a vacuum oven at 60 °C for 12 h to remove the solvent. The dried composite was then transferred into an Ar-filled glovebox and irradiated in a microwave reactor at 1000 W for 3 min to induce rapid alloying. After microwave treatment, the sample was naturally cooled to room temperature and stored for further characterization and electrochemical tests. By systematically varying both the Ni:Fe ratio and the total metal-ion concentration, the effects of bimetallic synergy and metal loading on electrocatalytic performance were investigated.

### **Materials Characterization.**

XRD patterns were collected on a D8 Advance diffractometer (Bruker, Germany) with Cu K $\alpha$  radiation ( $\lambda = 1.5406 \text{ \AA}$ ), and Raman spectra were recorded on a Renishaw inVia system (UK) using a 532 nm laser to identify the phase features. In-situ Raman spectra were recorded using 50 $\times$  objective, 5 mW laser power, and an 1800 grooves mm<sup>-1</sup> grating. A commercial MSL-III electrochemical Raman cell containing 1.0 M KOH was employed. The synthesized catalyst was used directly as the working electrode (electrically contacted by a copper strip), with Pt wire as the counter electrode and Ag/AgCl as the reference electrode. Sample morphology and microstructure were characterized by field-emission scanning electron microscopy (FESEM, S-4800, Hitachi, Japan) and high-resolution transmission electron microscopy (HRTEM, JEM-

2100F, JEOL, Japan) coupled with EDX analysis (Quantax-STEM, Bruker, Germany). Elemental compositions and oxidation states were determined by X-ray photoelectron spectroscopy (XPS, K-Alpha, Thermo Scientific, USA), with the C 1s signal at 284.6 eV used for binding-energy calibration. Nitrogen adsorption–desorption measurements were carried out on an Anton Paar Autosorb 6100 (FKM MP-MP) instrument. Before measurement, the samples were degassed under vacuum at 120 °C for 8 h. The specific surface area was calculated using the Brunauer-Emmett-Teller (BET) method, and the pore-size distribution/pore volume was derived from the adsorption–desorption isotherms using the BJH model.

### **Electrochemical Measurements.**

All OER measurements were carried out in 1.0 M KOH using a CHI760E electrochemical workstation (CH Instruments, Shanghai, China) with a standard three-electrode configuration. A graphite rod served as the counter electrode and a Hg/HgO electrode (1.0 M KOH) was used as the reference electrode. All potentials were converted to the reversible hydrogen electrode (RHE) scale. A catalyst ink was prepared and drop-cast onto nickel foam ( $1 \times 1 \text{ cm}^2$ ) as the working electrode. Specifically, 1.0 mg of catalyst powder and 19  $\mu\text{L}$  of Nafion solution (5 wt%) were dispersed in 70  $\mu\text{L}$  ethanol, followed by ultrasonication for 30 min to form a homogeneous ink. Then 18  $\mu\text{L}$  of the ink was uniformly pipetted onto a pre-cleaned nickel foam substrate (ultrasonically cleaned) and dried under a mercury lamp. The catalyst loading was controlled at  $1 \text{ mg cm}^{-2}$ . For comparison, commercial  $\text{RuO}_2$  was prepared using the same procedure with a loading of  $100 \mu\text{g cm}^{-2}$ . Cyclic voltammetry (CV) was used for electrode activation and for assessing redox features and capacitive behavior. Linear sweep voltammetry (LSV) for OER activity was recorded at a scan rate of  $5 \text{ mV s}^{-1}$ . Unless otherwise noted, LSV curves are presented in the range of 1.2-1.8 V (vs. RHE). Tafel analysis was conducted based on the LSV data using the Tafel equation. Electrochemical impedance spectroscopy (EIS) was performed at 0.60 V (vs. RHE) over a frequency range of 100 kHz-0.01 Hz (or 0.1 Hz, as specified) with an AC amplitude of 10 mV to evaluate charge-transfer behavior.

For AEMWE measurement, commercial Pt/C (50 wt%) was used as the cathode catalyst with a Pt loading of  $0.5 \text{ mg}_{\text{Pt}} \text{ cm}^{-2}$ . The catalyst and Kmem-A50 ionomer (catalyst/ionomer mass ratio = 85:15) were dispersed in a water/methanol mixture (mass ratio 1:3) and stirred for 1 h at room temperature. The suspension was then ultrasonicated for 2 h in an ultrasonic bath equipped with a low-temperature circulating thermostat to avoid overheating, yielding a homogeneous catalyst ink. The ink was deposited onto carbon paper using an ultrasonic spray coater. The anode ink was prepared following the same procedure, except that NiFe@GA-300 was used as the anode catalyst. The anode catalyst ink was drop-cast onto nickel felt using a micropipette and dried completely. The catalyst loading on both electrodes was controlled at  $2 \text{ mg cm}^{-2}$ . The Kmem-A50 membrane ( $50 \text{ }\mu\text{m}$ ) was sandwiched between the cathode and anode without hot pressing to form the MEA. The geometric active area of the MEA was  $1 \text{ cm}^2$ . Prior to electrolysis measurements, the MEA was soaked in 1.0 M KOH for 24 h to complete hydroxide ion exchange. The MEA was then assembled into the electrolyzer cell for AEMWE testing. The electrolyte temperature was set to the corresponding testing temperature during polarization measurements.

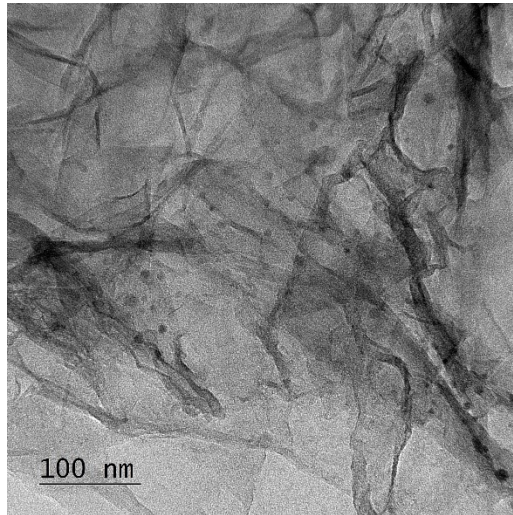

**Fig. S1.** TEM image of  $\text{Ni}_2\text{Fe}_2$  alloy nanoparticles on GA-300.

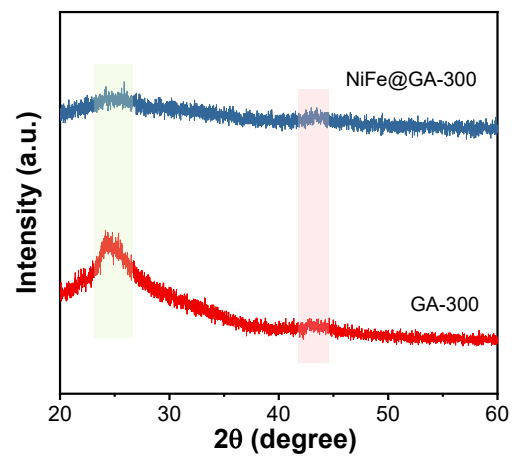

**Fig. S2.** XRD patterns of GA-300 and NiFe@GA-300.

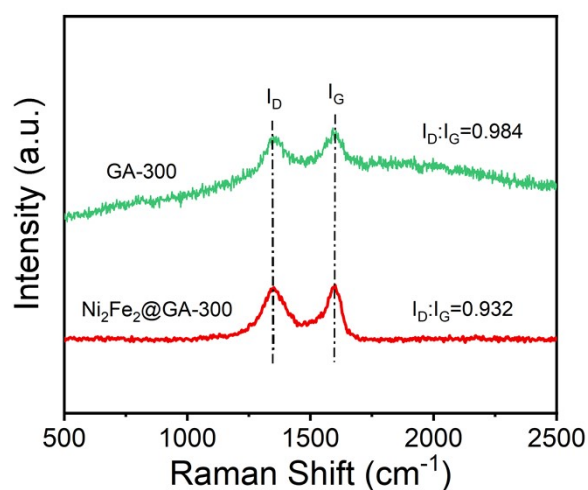

**Fig. S3.** Raman spectra of GA-300 and Ni<sub>2</sub>Fe<sub>2</sub>@GA-300.

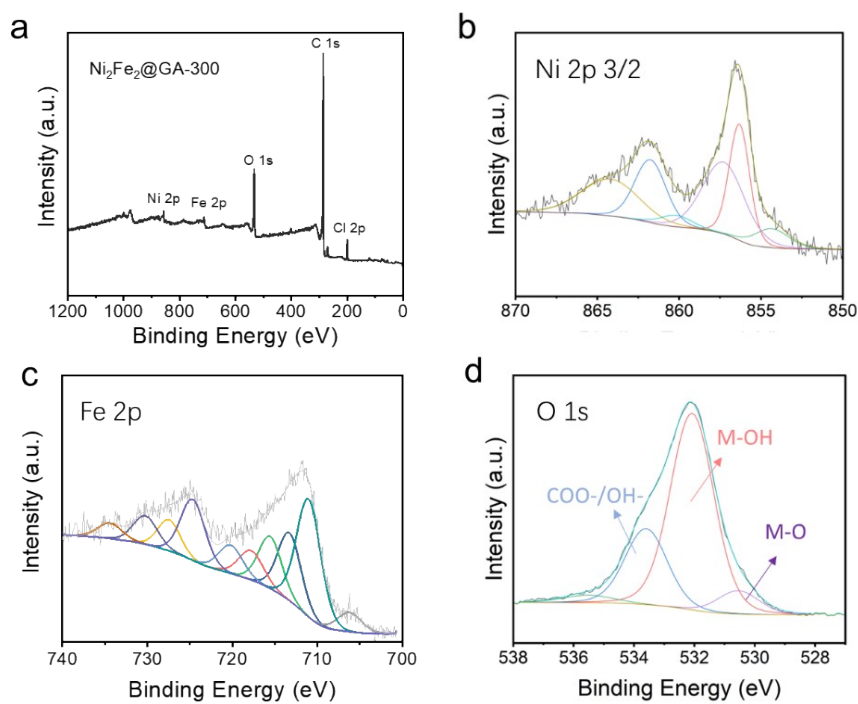

**Fig. S4.** XPS full spectra of Ni<sub>2</sub>Fe<sub>2</sub>@GA-300 and their high-resolution of Ni, Fe and O elements.

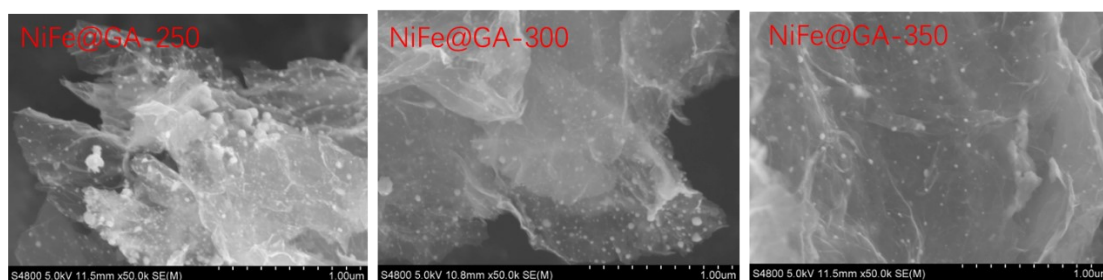

**Fig. S5.** SEM images of NiFe alloy nanoparticles on various GA samples annealed at different temperatures (250 °C, 300 °C, 350 °C)

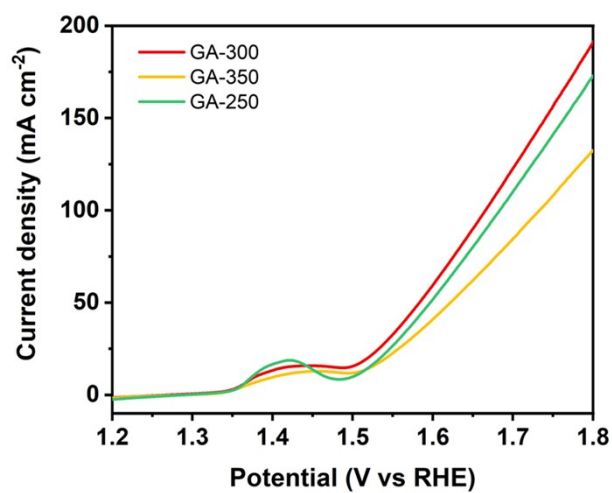

**Fig. S5.** OER LSV curves of NiFe@GA-*X* under GA annealing with different temperatures.

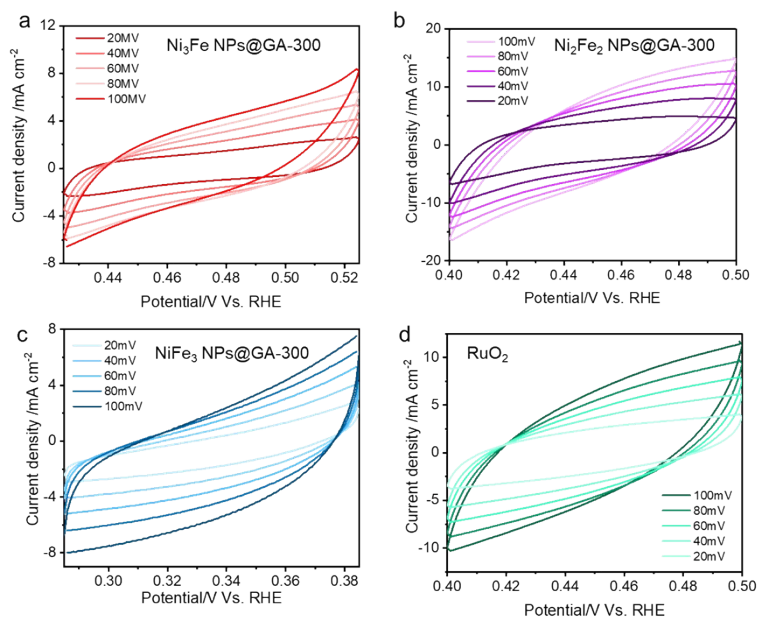

**Fig. S7.** CV cycles in the non-Faradic window of different NiFe@GA-300 samples at various scan rates.

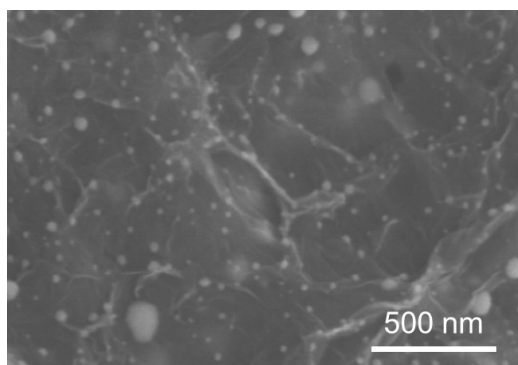

**Fig. S8.** SEM image of NiFe alloy nanoparticles on GO-300.

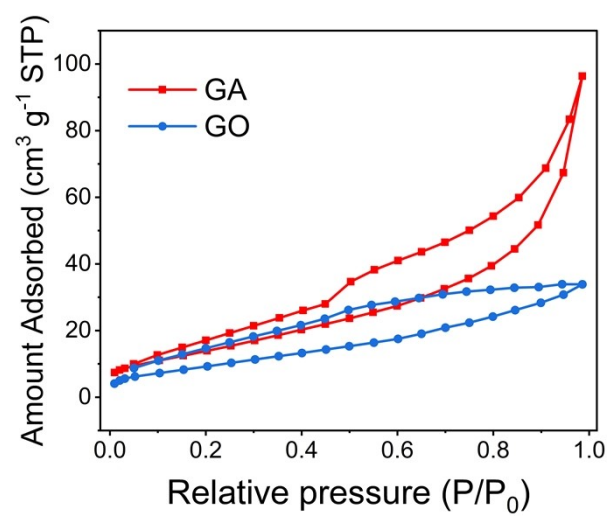

**Fig. S9.** N<sub>2</sub> adsorption and desorption curves of GA and GO.

**Table S1.** The fitted charge-transfer resistance ( $R_{ct}$ ) of the electrodes.

| <b>Anodes</b>                           | <b><math>R_{ct}</math> (<math>\Omega</math>)</b> |
|-----------------------------------------|--------------------------------------------------|
| Ni <sub>2</sub> Fe <sub>2</sub> @GA-300 | 24.2                                             |
| Ni <sub>2</sub> Fe <sub>2</sub> @GO-300 | 38.7                                             |
| RuO <sub>2</sub>                        | 65.6                                             |

**Table S2.** The textural properties of the GA and GO supports.

| <b>Supports</b> | <b>Specific Surface</b>       | <b>Total Pore</b>                | <b>Average Pore</b>                       |
|-----------------|-------------------------------|----------------------------------|-------------------------------------------|
|                 | <b>Area (m<sup>2</sup>/g)</b> | <b>Volume (cm<sup>3</sup>/g)</b> | <b>Diameter (<math>\text{\AA}</math>)</b> |
| GA              | 54.1                          | 0.1494                           | 110.52                                    |
| GO              | 36.3                          | 0.0525                           | 57.918                                    |

**Table S3.** Comparison of AEMWE performance with other OER non-precious metal catalysts.

| Anode (loading)                                                   | Cathode (loading)                             | Membrane                              | T (°C)<br>Electrolyte | $j$ (mA cm <sup>-2</sup> )<br>@Voltage | Stability                                                | Ref.                                                             |
|-------------------------------------------------------------------|-----------------------------------------------|---------------------------------------|-----------------------|----------------------------------------|----------------------------------------------------------|------------------------------------------------------------------|
| Ni <sub>2</sub> Fe <sub>2</sub> @G A-300 (2 mg cm <sup>-2</sup> ) | Pt/C (0.5 mg <sub>Pt</sub> cm <sup>-2</sup> ) | Kmem-A50                              | 65 °C<br>1M<br>KOH    | 1 A cm <sup>-2</sup><br>@1.66 V        | 100 h @1 A cm <sup>-2</sup><br>0.9 mV h <sup>-1</sup>    | <b>This work</b>                                                 |
| CoCrO <sub>x</sub> (1 mg cm <sup>-2</sup> )                       | Pt/C (1.5 mg <sub>Pt</sub> cm <sup>-2</sup> ) | PiperION-A60-HCO3                     | 60 °C<br>1M<br>KOH    | 1.5 A cm <sup>-2</sup><br>@2.1 V       | 120 h @0.5 A cm <sup>-2</sup><br><4.9 mV h <sup>-1</sup> | Nat. Commun. (2024) 15:3416                                      |
| (FeCoNiCrCu)Se <sub>x</sub> (H EMS)                               | Pt/C (N.A.)                                   | HELITE AEM01(eChemStore)              | 60 °C<br>1M<br>KOH    | 1.5 A cm <sup>-2</sup><br>@2.4 V       | 120 h @0.5 A cm <sup>-2</sup><br>No decay                | Joule (2024) 8, 2342–2356, Angew. Chem. Int. Ed. (2024) e2024044 |
| Nei-Ir <sub>1</sub> /CoGaOH                                       | Pt/C (N.A.)                                   | N.A.                                  | 80 °C<br>1M<br>KOH    | 1 A cm <sup>-2</sup><br>@2.1 V         | 50 h @1 A cm <sup>-2</sup><br>No decay                   | 18 Adv. Mater. (2024) 36, 2314211                                |
| Bi/BiCeO <sub>1.8</sub> H                                         | Pt/C (N.A.)                                   | Sustainion X37-50 (Dioxide Materials) | 50 °C<br>1M<br>KOH    | 1 A cm <sup>-2</sup><br>@1.79 V        | 100 h @1 A cm <sup>-2</sup><br>2.2% drop                 | Adv. Mater. (2025) e17292                                        |
| RuVCoCuZnW                                                        | RuVCoCuZnW                                    | N.A.                                  | 80 °C<br>1M<br>KOH    | 0.5 A cm <sup>-2</sup><br>@1.66 V      | N.A.                                                     | Chem. Eng. J. (2025) 522                                         |
| Co-CE30                                                           | PtRu/C (N.A.)                                 | HQPC-TMA (50 μm)                      | 70 °C<br>Pure water   | 1 A cm <sup>-2</sup><br>@2.15 V        | 40 h @1 A cm <sup>-2</sup><br>0.9 mV h <sup>-1</sup>     | 167795 Adv. Funct. Mater. (2025) 2506656                         |
| NiFeS (1.0 mg cm <sup>-2</sup> )                                  | Pt/C (2 mg <sub>Pt</sub> cm <sup>-2</sup> )   | PiperION-A60-HCO3                     | 60 °C<br>1M<br>KOH    | 1.84 A cm <sup>-2</sup><br>@2 V        | 300 h @1 A cm <sup>-2</sup><br>0.26 mV h <sup>-1</sup>   | Funct. Mater. (2025) 2506656                                     |

|                                       |                                                                |                               |                    |                                        |                                                             |                                                          |
|---------------------------------------|----------------------------------------------------------------|-------------------------------|--------------------|----------------------------------------|-------------------------------------------------------------|----------------------------------------------------------|
| B-MOF-Zn-Co                           | Pt/C<br>(N.A.)                                                 | Alkyer W-25                   | 50 °C<br>1M<br>KOH | 1 A cm <sup>-2</sup><br>@2.04 V        | 300 h @0.2 A<br>cm <sup>-2</sup><br>0.23 mV h <sup>-1</sup> | Small<br>(2024)<br>20,<br>2308517                        |
| S-HEO                                 | Pt/C<br>(N.A.)                                                 | LDPE-VBC-TMA                  | 60 °C<br>1M<br>KOH | 1 A cm <sup>-2</sup><br>@2.16 V        | 40 h @2 V<br>16% drop                                       | Small<br>(2024)<br>20,<br>2402241<br>Appl.               |
| CuNiFe-LDH (1.0 mg cm <sup>-2</sup> ) | NiFe <sub>2</sub> O <sub>4</sub><br>(1.0 mg cm <sup>-2</sup> ) | Sustainion X37-50 RT          | 50 °C<br>1M<br>KOH | 1.131 A<br>cm <sup>-2</sup><br>@1.85 V | 120 h @0.6 A<br>cm <sup>-2</sup><br>0.25 mV h <sup>-1</sup> | Catal. B:<br>Environ.<br>(2024)<br>340,<br>123187<br>ACS |
| NiFeW (2 mg cm <sup>-2</sup> )        | PtRu/C<br>(0.5 mg cm <sup>-2</sup> )                           | PiperION-A40-HCO <sub>3</sub> | 70 °C<br>1M<br>KOH | 2.12 A<br>cm <sup>-2</sup> @2<br>V     | N.A.                                                        | Catal.<br>(2026)<br>16,<br>4449-446<br>2                 |
